# Supplementary material
Source: PubMed Central journal article supplement (PMC3323007)

## SUPPLEMENTAL FIGURE LEGENDS

**Supplemental Figure 1: Glycolytic enzyme molecules are not externalized on autophagic or necrotic cells.** HeLa cells that were induced to undergo autophagy by serum starvation with L-canavanine (1 mM) in the presence of the pan-caspase inhibitor Q-VD-OPh (10  $\mu$ M), apoptotic HeLa cells (induced by serum starvation in the absence of Q-VD-OPh), and viable HeLa cells were analyzed cytofluorimetrically following staining for **(A)**  $\alpha$ -Enolase (with polyclonal Rabbit anti-  $\alpha$ -Enolase peptide IgG and secondary FITC-conjugated Goat anti-Rabbit IgG [Abcam]), **(B)** GAPDH (with polyclonal Rabbit anti-GAPDH IgG and secondary FITC-conjugated Goat anti-Rabbit IgG [Abcam]), and **(C)** Triosephosphate Isomerase (with polyclonal Rabbit anti-Triosephosphate Isomerase peptide IgG and secondary FITC-conjugated Goat anti-Rabbit IgG [Abcam]). Profiles shown **(A-C)** are for autophagic (orange, solid lines), apoptotic (solid green histograms), and viable (black, dashed lines) cells stained with the specific FITC-conjugated reagents. Cells that had lost membrane integrity ( $PI^+$ , low forward- and side-angle light scatter) were excluded from these analyses by electronic gating. Cells triggered to die necrotically also were analyzed, as in Figure 8, following staining with PE-conjugated annexin V, 7-AAD, and reagents specific (as above) for **(D)**  $\alpha$ -Enolase, **(E)** GAPDH, and **(F)** Triosephosphate Isomerase. Cells that met the criteria of staining positively with annexin V and negatively with 7-AAD (annexin  $V^+$  7-AAD $^-$ ) were gated electronically, and the fluorescein signal of those cells was analyzed (shown as solid violet histograms in panels **D-F**). The fluorescein signal of annexin  $V^+$  7-AAD $^-$  cells stained with secondary antibody alone also is presented (gray, dotted lines in panels **D-F**).

**Supplemental Figure 2: Apoptotic externalization of glycolytic enzyme molecules is caspase-dependent.** HeLa cells, subjected to irradiation with UV-C light in the presence of the pan-caspase inhibitor Q-VD-OPh (10  $\mu$ M, including 90 min. pre-treatment) and in its absence, were analyzed cytofluorimetrically following staining, as in Supplementary Figure 1, for **(A)**  $\alpha$ -Enolase, **(B)** GAPDH, and **(C)** Triosephosphate Isomerase. Profiles shown are for cells irradiated in the presence of Q-VD-OPh (blue, solid lines) and in its absence (solid green histograms). The fluorescein signal of cells stained with secondary antibody alone also is presented (gray, dotted lines). Cells that had lost membrane integrity ( $PI^+$ , low forward- and side-angle light scatter) were excluded from these analyses by electronic gating.

SUPPLEMENTAL TABLE

**Supplemental Table I: Relative abundance of all apoptotic membrane-associated proteins identified by iTRAQ analysis.**

|    | <b>Identified Proteins</b>                           | <b>Accession ID</b> | <b>Ratio</b> | <b>T-test</b> |
|----|------------------------------------------------------|---------------------|--------------|---------------|
| 1  | 10 kDa heat shock protein, mitochondrial             | CH10_HUMAN          | 1.15         | 0.11          |
| 2  | 116 kDa U5 small nuclear ribonucleoprotein component | U5S1_HUMAN          | 1.00         | 1.00          |
| 3  | 14-3-3 protein beta/alpha                            | 1433B_HUMAN         | 1.57         | 0.02          |
| 4  | 14-3-3 protein epsilon                               | 1433E_HUMAN         | 1.36         | 0.05          |
| 5  | 14-3-3 protein gamma                                 | 1433G_HUMAN         | 0.97         | 0.91          |
| 6  | 14-3-3 protein theta                                 | 1433T_HUMAN         | 1.28         | 0.39          |
| 7  | 14-3-3 protein zeta/delta                            | 1433Z_HUMAN         | 1.22         | 0.25          |
| 8  | 26S protease regulatory subunit 4                    | PRS4_HUMAN          | 0.84         | 0.04          |
| 9  | 26S protease regulatory subunit 6A                   | PRS6A_HUMAN         | 0.90         | 0.50          |
| 10 | 26S protease regulatory subunit 6B                   | PRS6B_HUMAN         | 0.85         | 0.22          |
| 11 | 26S protease regulatory subunit 7                    | PRS7_HUMAN          | 1.03         | 0.82          |
| 12 | 26S proteasome non-ATPase regulatory subunit 11      | PSD11_HUMAN         | 0.96         | 0.79          |
| 13 | 26S proteasome non-ATPase regulatory subunit 13      | PSD13_HUMAN         | 0.55         | 0.16          |
| 14 | 26S proteasome non-ATPase regulatory subunit 2       | PSMD2_HUMAN         | 0.91         | 0.82          |
| 15 | 26S proteasome non-ATPase regulatory subunit 5       | PSMD5_HUMAN         | 0.58         | 0.10          |
| 16 | 26S proteasome non-ATPase regulatory subunit 6       | PSMD6_HUMAN         | 0.81         | 0.40          |
| 17 | 26S proteasome non-ATPase regulatory subunit 8       | PSMD8_HUMAN         | 0.55         | 0.12          |
| 18 | 28S ribosomal protein S23, mitochondrial             | RT23_HUMAN          | 0.79         | 0.59          |
| 19 | 2-oxoglutarate dehydrogenase, mitochondrial          | ODO1_HUMAN          | 0.67         | 0.17          |
| 20 | 39S ribosomal protein L12, mitochondrial             | RM12_HUMAN          | 0.99         | 0.95          |
| 21 | 40S ribosomal protein S10                            | RS10_HUMAN          | 0.76         | 0.03          |
| 22 | 40S ribosomal protein S11                            | RS11_HUMAN          | 0.93         | 0.29          |
| 23 | 40S ribosomal protein S12                            | RS12_HUMAN          | 0.78         | 0.10          |
| 24 | 40S ribosomal protein S13                            | RS13_HUMAN          | 0.75         | 0.15          |
| 25 | 40S ribosomal protein S14                            | RS14_HUMAN          | 0.84         | 0.26          |
| 26 | 40S ribosomal protein S15                            | RS15_HUMAN          | 0.87         | 0.29          |
| 27 | 40S ribosomal protein S15a                           | RS15A_HUMAN         | 0.68         | 0.01          |
| 28 | 40S ribosomal protein S16                            | RS16_HUMAN          | 0.68         | 0.05          |
| 29 | 40S ribosomal protein S17                            | RS17_HUMAN          | 0.52         | 0.00          |
| 30 | 40S ribosomal protein S18                            | RS18_HUMAN          | 0.66         | 0.04          |
| 31 | 40S ribosomal protein S19                            | RS19_HUMAN          | 0.78         | 0.02          |
| 32 | 40S ribosomal protein S2                             | RS2_HUMAN           | 0.57         | 0.03          |
| 33 | 40S ribosomal protein S20                            | RS20_HUMAN          | 0.88         | 0.47          |
| 34 | 40S ribosomal protein S23                            | RS23_HUMAN          | 0.57         | 0.01          |
| 35 | 40S ribosomal protein S24                            | RS24_HUMAN          | 0.81         | 0.11          |
| 36 | 40S ribosomal protein S25                            | RS25_HUMAN          | 0.84         | 0.17          |
| 37 | 40S ribosomal protein S26                            | RS26_HUMAN          | 0.94         | 0.61          |
| 38 | 40S ribosomal protein S27                            | RS27_HUMAN          | 1.07         | 0.29          |
| 39 | 40S ribosomal protein S3                             | RS3_HUMAN           | 0.87         | 0.20          |
| 40 | 40S ribosomal protein S3a                            | RS3A_HUMAN          | 0.68         | 0.05          |
| 41 | 40S ribosomal protein S4, X isoform                  | RS4X_HUMAN          | 0.81         | 0.05          |
| 42 | 40S ribosomal protein S5                             | RS5_HUMAN           | 0.67         | 0.11          |
| 43 | 40S ribosomal protein S6                             | RS6_HUMAN           | 0.78         | 0.10          |
| 44 | 40S ribosomal protein S7                             | RS7_HUMAN           | 1.07         | 0.55          |

|    |                                                               |             |      |      |
|----|---------------------------------------------------------------|-------------|------|------|
| 45 | 40S ribosomal protein S8                                      | RS8_HUMAN   | 0.84 | 0.03 |
| 46 | 40S ribosomal protein S9                                      | RS9_HUMAN   | 0.68 | 0.01 |
| 47 | 40S ribosomal protein SA                                      | RSSA_HUMAN  | 0.84 | 0.15 |
| 48 | 4F2 cell-surface antigen heavy chain                          | 4F2_HUMAN   | 0.90 | 0.32 |
| 49 | 60 kDa heat shock protein, mitochondrial                      | CH60_HUMAN  | 1.14 | 0.33 |
| 50 | 60S acidic ribosomal protein P0                               | RLA0_HUMAN  | 0.84 | 0.04 |
| 51 | 60S acidic ribosomal protein P1                               | RLA1_HUMAN  | 0.96 | 0.69 |
| 52 | 60S acidic ribosomal protein P2                               | RLA2_HUMAN  | 0.97 | 0.42 |
| 53 | 60S ribosomal protein L10                                     | RL10_HUMAN  | 0.78 | 0.02 |
| 54 | 60S ribosomal protein L10a                                    | RL10A_HUMAN | 0.73 | 0.14 |
| 55 | 60S ribosomal protein L11                                     | RL11_HUMAN  | 0.94 | 0.61 |
| 56 | 60S ribosomal protein L12                                     | RL12_HUMAN  | 0.81 | 0.08 |
| 57 | 60S ribosomal protein L13                                     | RL13_HUMAN  | 0.71 | 0.02 |
| 58 | 60S ribosomal protein L13a                                    | RL13A_HUMAN | 0.81 | 0.05 |
| 59 | 60S ribosomal protein L14                                     | RL14_HUMAN  | 0.62 | 0.04 |
| 60 | 60S ribosomal protein L15                                     | RL15_HUMAN  | 0.71 | 0.03 |
| 61 | 60S ribosomal protein L17                                     | RL17_HUMAN  | 0.84 | 0.15 |
| 62 | 60S ribosomal protein L18                                     | RL18_HUMAN  | 0.71 | 0.02 |
| 63 | 60S ribosomal protein L18a                                    | RL18A_HUMAN | 0.81 | 0.05 |
| 64 | 60S ribosomal protein L19                                     | RL19_HUMAN  | 0.45 | 0.03 |
| 65 | 60S ribosomal protein L21                                     | RL21_HUMAN  | 0.78 | 0.02 |
| 66 | 60S ribosomal protein L23                                     | RL23_HUMAN  | 0.71 | 0.05 |
| 67 | 60S ribosomal protein L23a                                    | RL23A_HUMAN | 0.81 | 0.05 |
| 68 | 60S ribosomal protein L24                                     | RL24_HUMAN  | 0.50 | 0.02 |
| 69 | 60S ribosomal protein L26                                     | RL26_HUMAN  | 0.66 | 0.00 |
| 70 | 60S ribosomal protein L27                                     | RL27_HUMAN  | 0.65 | 0.09 |
| 71 | 60S ribosomal protein L27a                                    | RL27A_HUMAN | 1.03 | 0.71 |
| 72 | 60S ribosomal protein L28                                     | RL28_HUMAN  | 0.87 | 0.11 |
| 73 | 60S ribosomal protein L3                                      | RL3_HUMAN   | 0.73 | 0.05 |
| 74 | 60S ribosomal protein L30                                     | RL30_HUMAN  | 0.93 | 0.29 |
| 75 | 60S ribosomal protein L31                                     | RL31_HUMAN  | 0.87 | 0.29 |
| 76 | 60S ribosomal protein L32                                     | RL32_HUMAN  | 0.58 | 0.01 |
| 77 | 60S ribosomal protein L34                                     | RL34_HUMAN  | 0.56 | 0.04 |
| 78 | 60S ribosomal protein L35                                     | RL35_HUMAN  | 0.73 | 0.01 |
| 79 | 60S ribosomal protein L35a                                    | RL35A_HUMAN | 0.84 | 0.03 |
| 80 | 60S ribosomal protein L36a                                    | RL36A_HUMAN | 0.59 | 0.00 |
| 81 | 60S ribosomal protein L37                                     | RL37_HUMAN  | 0.81 | 0.11 |
| 82 | 60S ribosomal protein L37a                                    | RL37A_HUMAN | 0.84 | 0.15 |
| 83 | 60S ribosomal protein L4                                      | RL4_HUMAN   | 0.78 | 0.02 |
| 84 | 60S ribosomal protein L5                                      | RL5_HUMAN   | 0.73 | 0.07 |
| 85 | 60S ribosomal protein L6                                      | RL6_HUMAN   | 0.73 | 0.02 |
| 86 | 60S ribosomal protein L7                                      | RL7_HUMAN   | 0.84 | 0.03 |
| 87 | 60S ribosomal protein L7a                                     | RL7A_HUMAN  | 0.78 | 0.02 |
| 88 | 60S ribosomal protein L9                                      | RL9_HUMAN   | 0.60 | 0.02 |
| 89 | 6-phosphofructokinase type C                                  | K6PP_HUMAN  | 0.81 | 0.08 |
| 90 | 6-phosphogluconate dehydrogenase, decarboxylating             | 6PGD_HUMAN  | 1.23 | 0.29 |
| 91 | 78 kDa glucose-regulated protein                              | GRP78_HUMAN | 0.89 | 0.53 |
| 92 | Acidic leucine-rich nuclear phosphoprotein 32 family member A | AN32A_HUMAN | 1.19 | 0.03 |
| 93 | Actin-related protein 2                                       | ARP2_HUMAN  | 0.84 | 0.04 |
| 94 | Actin-related protein 2/3 complex subunit 2                   | ARPC2_HUMAN | 1.27 | 0.02 |

|     |                                                             |             |      |      |
|-----|-------------------------------------------------------------|-------------|------|------|
| 95  | Actin-related protein 2/3 complex subunit 3                 | ARPC3_HUMAN | 1.37 | 0.01 |
| 96  | Actin-related protein 2/3 complex subunit 4                 | ARPC4_HUMAN | 1.12 | 0.42 |
| 97  | Actin-related protein 3                                     | ARP3_HUMAN  | 1.19 | 0.31 |
| 98  | Activated RNA polymerase II transcriptional coactivator p15 | TCP4_HUMAN  | 0.87 | 0.20 |
| 99  | Acyl-CoA-binding protein                                    | ACBP_HUMAN  | 1.94 | 0.05 |
| 100 | Adenosylhomocysteinase                                      | SAHH_HUMAN  | 1.10 | 0.56 |
| 101 | Adenylyl cyclase-associated protein 1                       | CAP1_HUMAN  | 1.23 | 0.18 |
| 102 | ADP/ATP translocase 2                                       | ADT2_HUMAN  | 0.73 | 0.05 |
| 103 | ADP-ribosylation factor 1                                   | ARF1_HUMAN  | 1.03 | 0.42 |
| 104 | ADP-ribosylation factor 4                                   | ARF4_HUMAN  | 0.87 | 0.29 |
| 105 | ADP-ribosylation factor 6                                   | ARF6_HUMAN  | 0.86 | 0.75 |
| 106 | Alanyl-tRNA synthetase, cytoplasmic                         | SYAC_HUMAN  | 1.19 | 0.17 |
| 107 | Aldose reductase                                            | ALDR_HUMAN  | 1.68 | 0.02 |
| 108 | Alkaline phosphatase, tissue-nonspecific isozyme            | PPBT_HUMAN  | 0.42 | 0.03 |
| 109 | Alpha-actinin-1                                             | ACTN1_HUMAN | 1.46 | 0.01 |
| 110 | Alpha-actinin-4                                             | ACTN4_HUMAN | 1.18 | 0.22 |
| 111 | Alpha-centractin                                            | ACTZ_HUMAN  | 1.55 | 0.22 |
| 112 | Alpha-enolase                                               | ENOA_HUMAN  | 1.46 | 0.03 |
| 113 | Annexin A1                                                  | ANXA1_HUMAN | 0.66 | 0.04 |
| 114 | Annexin A11                                                 | ANX11_HUMAN | 1.17 | 0.42 |
| 115 | Annexin A2                                                  | ANXA2_HUMAN | 0.57 | 0.03 |
| 116 | Annexin A3                                                  | ANXA3_HUMAN | 1.16 | 0.51 |
| 117 | Annexin A5                                                  | ANXA5_HUMAN | 0.45 | 0.02 |
| 118 | Annexin A6                                                  | ANXA6_HUMAN | 0.47 | 0.02 |
| 119 | AP-2 complex subunit beta                                   | AP2B1_HUMAN | 0.87 | 0.29 |
| 120 | Arginyl-tRNA synthetase, cytoplasmic                        | SYRC_HUMAN  | 0.71 | 0.07 |
| 121 | Asparagine synthetase [glutamine-hydrolyzing]               | ASNS_HUMAN  | 0.42 | 0.02 |
| 122 | Asparaginyl-tRNA synthetase, cytoplasmic                    | SYNC_HUMAN  | 0.90 | 0.32 |
| 123 | Aspartate aminotransferase, mitochondrial                   | AATM_HUMAN  | 1.03 | 0.71 |
| 124 | Aspartyl/asparaginyl beta-hydroxylase                       | ASPH_HUMAN  | 0.84 | 0.17 |
| 125 | Aspartyl-tRNA synthetase, cytoplasmic                       | SYDC_HUMAN  | 0.68 | 0.01 |
| 126 | ATP synthase subunit alpha, mitochondrial                   | ATPA_HUMAN  | 0.86 | 0.42 |
| 127 | ATP synthase subunit b, mitochondrial                       | AT5F1_HUMAN | 1.14 | 0.58 |
| 128 | ATP synthase subunit beta, mitochondrial                    | ATPB_HUMAN  | 0.87 | 0.34 |
| 129 | ATP synthase subunit d, mitochondrial                       | ATP5H_HUMAN | 1.46 | 0.01 |
| 130 | ATP synthase subunit gamma, mitochondrial                   | ATPG_HUMAN  | 0.84 | 0.26 |
| 131 | ATPase inhibitor, mitochondrial                             | ATIF1_HUMAN | 1.28 | 0.47 |
| 132 | ATP-citrate synthase                                        | ACLY_HUMAN  | 0.90 | 0.10 |
| 133 | ATP-dependent DNA helicase Q1                               | RECQ1_HUMAN | 0.57 | 0.14 |
| 134 | ATP-dependent RNA helicase A                                | DHX9_HUMAN  | 0.84 | 0.04 |
| 135 | ATP-dependent RNA helicase DDX39                            | DDX39_HUMAN | 0.89 | 0.53 |
| 136 | ATP-dependent RNA helicase DDX3X                            | DDX3X_HUMAN | 0.93 | 0.29 |
| 137 | Barrier-to-autointegration factor                           | BAF_HUMAN   | 0.73 | 0.07 |
| 138 | Basic leucine zipper and W2 domain-containing protein 1     | BZW1_HUMAN  | 0.97 | 0.42 |
| 139 | Basigin                                                     | BASI_HUMAN  | 1.04 | 0.79 |
| 140 | B-cell receptor-associated protein 31                       | BAP31_HUMAN | 0.86 | 0.50 |
| 141 | Bifunctional aminoacyl-tRNA synthetase                      | SYEP_HUMAN  | 0.90 | 0.31 |
| 142 | Brain acid soluble protein 1                                | BASP1_HUMAN | 0.87 | 0.34 |
| 143 | BTB/POZ domain-containing protein KCTD12                    | KCD12_HUMAN | 1.50 | 0.07 |
| 144 | C-1-tetrahydrofolate synthase, cytoplasmic                  | C1TC_HUMAN  | 0.76 | 0.20 |

|     |                                                                 |             |      |      |
|-----|-----------------------------------------------------------------|-------------|------|------|
| 145 | CAD protein                                                     | PYR1_HUMAN  | 0.98 | 0.94 |
| 146 | Calmodulin                                                      | CALM_HUMAN  | 1.25 | 0.58 |
| 147 | Calnexin                                                        | CALX_HUMAN  | 0.93 | 0.55 |
| 148 | Calpastatin                                                     | ICAL_HUMAN  | 1.68 | 0.03 |
| 149 | Calreticulin                                                    | CALR_HUMAN  | 0.75 | 0.21 |
| 150 | Calumenin                                                       | CALU_HUMAN  | 0.73 | 0.01 |
| 151 | Caprin-1                                                        | CAPR1_HUMAN | 1.15 | 0.29 |
| 152 | Carbamoyl-phosphate synthase [ammonia], mitochondrial           | CPSM_HUMAN  | 0.81 | 0.22 |
| 153 | Carbonyl reductase [NADPH] 1                                    | CBR1_HUMAN  | 1.37 | 0.07 |
| 154 | Casein kinase II subunit alpha                                  | CSK21_HUMAN | 0.90 | 0.09 |
| 155 | Cation-dependent mannose-6-phosphate receptor                   | MPRD_HUMAN  | 0.96 | 0.74 |
| 156 | Cation-independent mannose-6-phosphate receptor                 | MPRI_HUMAN  | 0.63 | 0.20 |
| 157 | CD44 antigen                                                    | CD44_HUMAN  | 1.11 | 0.31 |
| 158 | CD59 glycoprotein                                               | CD59_HUMAN  | 0.48 | 0.09 |
| 159 | CD9 antigen                                                     | CD9_HUMAN   | 0.93 | 0.68 |
| 160 | Cell division protein kinase 1                                  | CDK1_HUMAN  | 1.15 | 0.34 |
| 161 | Cell surface glycoprotein MUC18                                 | MUC18_HUMAN | 0.81 | 0.32 |
| 162 | Chloride intracellular channel protein 1                        | CLIC1_HUMAN | 0.99 | 0.97 |
| 163 | Chromobox protein homolog 3                                     | CBX3_HUMAN  | 1.07 | 0.42 |
| 164 | Citrate synthase, mitochondrial                                 | CISY_HUMAN  | 0.93 | 0.29 |
| 165 | Clathrin heavy chain 1                                          | CLH1_HUMAN  | 0.75 | 0.15 |
| 166 | Clathrin light chain A                                          | CLCA_HUMAN  | 0.68 | 0.05 |
| 167 | Clathrin light chain B                                          | CLCB_HUMAN  | 0.76 | 0.11 |
| 168 | Coatomer subunit alpha                                          | COPA_HUMAN  | 1.03 | 0.87 |
| 169 | Coatomer subunit beta                                           | COPB_HUMAN  | 0.97 | 0.80 |
| 170 | Cofilin-1                                                       | COF1_HUMAN  | 1.32 | 0.03 |
| 171 | Cold shock domain-containing protein E1                         | CSDE1_HUMAN | 1.07 | 0.42 |
| 172 | Complement C1Q subcomponent-binding protein, mitochondrial      | C1QBP_HUMAN | 1.23 | 0.17 |
| 173 | Complement decay-accelerating factor                            | DAF_HUMAN   | 0.68 | 0.11 |
| 174 | Condensin complex subunit 1                                     | CND1_HUMAN  | 0.73 | 0.47 |
| 175 | Core histone macro-H2A.1                                        | H2AY_HUMAN  | 1.00 | 0.42 |
| 176 | Creatine kinase B-type                                          | KCRB_HUMAN  | 1.37 | 0.37 |
| 177 | Cyclin-dependent kinase inhibitor 2A, isoforms 1/2/3            | CD2A1_HUMAN | 1.42 | 0.11 |
| 178 | Cystatin-B                                                      | CYTB_HUMAN  | 1.54 | 0.18 |
| 179 | Cytochrome b5                                                   | CYB5_HUMAN  | 0.84 | 0.04 |
| 180 | Cytochrome b-c1 complex subunit 7                               | QCR7_HUMAN  | 0.50 | 0.02 |
| 181 | Cytochrome c                                                    | CYC_HUMAN   | 2.71 | 0.01 |
| 182 | Cytoplasmic dynein 1 heavy chain 1                              | DYHC1_HUMAN | 0.69 | 0.09 |
| 183 | Cytosolic phospholipase A2                                      | PA24A_HUMAN | 1.46 | 0.01 |
| 184 | D-3-phosphoglycerate dehydrogenase                              | SERA_HUMAN  | 0.97 | 0.71 |
| 185 | D-dopachrome decarboxylase                                      | DOPD_HUMAN  | 1.35 | 0.14 |
| 186 | Delta(3,5)-Delta(2,4)-dienoyl-CoA isomerase, mitochondrial      | ECH1_HUMAN  | 0.66 | 0.01 |
| 187 | Deoxyuridine 5'-triphosphate nucleotidohydrolase, mitochondrial | DUT_HUMAN   | 1.07 | 0.29 |
| 188 | Destrin                                                         | DEST_HUMAN  | 1.11 | 0.31 |
| 189 | Dihydrolipoyl dehydrogenase, mitochondrial                      | DLDH_HUMAN  | 0.90 | 0.31 |
| 190 | Dihydropyrimidinase-related protein 2                           | DPYL2_HUMAN | 0.96 | 0.87 |
| 191 | Dipeptidyl peptidase 1                                          | CATC_HUMAN  | 0.31 | 0.02 |
| 192 | DNA damage-binding protein 1                                    | DDB1_HUMAN  | 0.88 | 0.63 |
| 193 | DNA replication licensing factor MCM2                           | MCM2_HUMAN  | 1.07 | 0.29 |
| 194 | DNA replication licensing factor MCM4                           | MCM4_HUMAN  | 0.64 | 0.02 |

|     |                                                                     |             |      |      |
|-----|---------------------------------------------------------------------|-------------|------|------|
| 195 | DNA replication licensing factor MCM5                               | MCM5_HUMAN  | 0.60 | 0.02 |
| 196 | DNA replication licensing factor MCM6                               | MCM6_HUMAN  | 1.07 | 0.29 |
| 197 | DNA replication licensing factor MCM7                               | MCM7_HUMAN  | 0.67 | 0.16 |
| 198 | DNA topoisomerase 1                                                 | TOP1_HUMAN  | 0.96 | 0.69 |
| 199 | DNA topoisomerase 2-alpha                                           | TOP2A_HUMAN | 0.73 | 0.01 |
| 200 | DNA-dependent protein kinase catalytic subunit                      | PRKDC_HUMAN | 0.76 | 0.03 |
| 201 | DnaJ homolog subfamily A member 1                                   | DNJA1_HUMAN | 1.28 | 0.20 |
| 202 | Dolichyl-diphosphooligosac.-protein glycosyltransferase 48 kDa sub. | OST48_HUMAN | 0.98 | 0.92 |
| 203 | Dolichyl-diphosphooligosac.-protein glycosyltransferase subunit 1   | RPN1_HUMAN  | 0.99 | 0.95 |
| 204 | Dolichyl-diphosphooligosac.-protein glycosyltransferase subunit 2   | RPN2_HUMAN  | 0.72 | 0.16 |
| 205 | Dolichyl-diphosphooligosac.-protein glycosyltransferase sub. STT3B  | STT3B_HUMAN | 0.79 | 0.39 |
| 206 | EGF-like repeat and discoïdin I-like domain-containing protein 3    | EDIL3_HUMAN | 0.68 | 0.05 |
| 207 | Elongation factor 1-alpha 1                                         | EF1A1_HUMAN | 1.00 | 0.42 |
| 208 | Elongation factor 1-beta                                            | EF1B_HUMAN  | 1.11 | 0.10 |
| 209 | Elongation factor 1-delta                                           | EF1D_HUMAN  | 1.00 | 1.00 |
| 210 | Elongation factor 1-gamma                                           | EF1G_HUMAN  | 1.19 | 0.04 |
| 211 | Elongation factor 2                                                 | EF2_HUMAN   | 1.19 | 0.03 |
| 212 | Elongation factor Tu, mitochondrial                                 | EFTU_HUMAN  | 0.90 | 0.32 |
| 213 | Emerin                                                              | EMD_HUMAN   | 0.88 | 0.53 |
| 234 | Endoplasmic reticulum resident protein 29                           | ERP29_HUMAN | 0.78 | 0.20 |
| 215 | Endoplasmin                                                         | ENPL_HUMAN  | 0.84 | 0.17 |
| 216 | Endothelin-converting enzyme 1                                      | ECE1_HUMAN  | 0.62 | 0.04 |
| 217 | Enhancer of rudimentary homolog                                     | ERH_HUMAN   | 0.94 | 0.82 |
| 218 | Equilibrative nucleoside transporter 1                              | S29A1_HUMAN | 0.92 | 0.69 |
| 219 | Erythrocyte band 7 integral membrane protein                        | STOM_HUMAN  | 1.07 | 0.55 |
| 220 | Eukaryotic initiation factor 4A-I                                   | IF4A1_HUMAN | 0.97 | 0.42 |
| 221 | Eukaryotic initiation factor 4A-III                                 | IF4A3_HUMAN | 0.97 | 0.71 |
| 222 | Eukaryotic peptide chain release factor GTP-binding subunit ERF3A   | ERF3A_HUMAN | 1.27 | 0.02 |
| 223 | Eukaryotic translation elongation factor 1 epsilon-1                | MCA3_HUMAN  | 1.37 | 0.26 |
| 224 | Eukaryotic translation initiation factor 1A, X-chromosomal          | IF1AX_HUMAN | 1.18 | 0.34 |
| 225 | Eukaryotic translation initiation factor 2 subunit 1                | IF2A_HUMAN  | 1.16 | 0.51 |
| 226 | Eukaryotic translation initiation factor 2 subunit 2-like protein   | IF2BL_HUMAN | 0.87 | 0.29 |
| 227 | Eukaryotic translation initiation factor 2 subunit 3                | IF2G_HUMAN  | 0.73 | 0.12 |
| 228 | Eukaryotic translation initiation factor 3 subunit A                | EIF3A_HUMAN | 1.19 | 0.17 |
| 229 | Eukaryotic translation initiation factor 3 subunit B                | EIF3B_HUMAN | 0.87 | 0.34 |
| 230 | Eukaryotic translation initiation factor 3 subunit C                | EIF3C_HUMAN | 0.95 | 0.80 |
| 231 | Eukaryotic translation initiation factor 3 subunit I                | EIF3I_HUMAN | 0.93 | 0.55 |
| 232 | Eukaryotic translation initiation factor 3 subunit L                | EIF3L_HUMAN | 1.04 | 0.42 |
| 233 | Eukaryotic translation initiation factor 4 gamma 1                  | IF4G1_HUMAN | 0.96 | 0.74 |
| 234 | Eukaryotic translation initiation factor 5A-1                       | IF5A1_HUMAN | 1.11 | 0.31 |
| 235 | Exportin-1                                                          | XPO1_HUMAN  | 1.19 | 0.30 |
| 236 | Exportin-2                                                          | XPO2_HUMAN  | 1.55 | 0.09 |
| 237 | Ezrin                                                               | EZRI_HUMAN  | 1.32 | 0.03 |
| 238 | FACT complex subunit SSRP1                                          | SSRP1_HUMAN | 0.57 | 0.13 |
| 239 | F-actin-capping protein subunit beta                                | CAPZB_HUMAN | 0.81 | 0.11 |
| 240 | Far upstream element-binding protein 1                              | FUBP1_HUMAN | 0.96 | 0.79 |
| 241 | Farnesyl pyrophosphate synthase                                     | FPPS_HUMAN  | 1.11 | 0.49 |
| 242 | Fascin                                                              | FSCN1_HUMAN | 1.47 | 0.09 |
| 243 | Fatty acid synthase                                                 | FAS_HUMAN   | 1.23 | 0.00 |
| 244 | Fatty aldehyde dehydrogenase                                        | AL3A2_HUMAN | 0.72 | 0.33 |

|     |                                                                  |             |      |      |
|-----|------------------------------------------------------------------|-------------|------|------|
| 245 | Filamin-A                                                        | FLNA_HUMAN  | 0.84 | 0.04 |
| 246 | Filamin-B                                                        | FLNB_HUMAN  | 1.23 | 0.08 |
| 247 | Flap endonuclease 1                                              | FEN1_HUMAN  | 0.93 | 0.55 |
| 248 | Fructose-bisphosphate aldolase A                                 | ALDOA_HUMAN | 1.46 | 0.03 |
| 249 | Fumarate hydratase, mitochondrial                                | FUMH_HUMAN  | 1.37 | 0.07 |
| 250 | Galectin-1                                                       | LEG1_HUMAN  | 1.17 | 0.42 |
| 251 | Gelsolin                                                         | GELS_HUMAN  | 0.59 | 0.07 |
| 252 | General transcription factor II-I                                | GTF2I_HUMAN | 0.91 | 0.56 |
| 253 | Glucose-6-phosphate 1-dehydrogenase                              | G6PD_HUMAN  | 0.90 | 0.42 |
| 254 | Glucose-6-phosphate isomerase                                    | G6PI_HUMAN  | 1.36 | 0.12 |
| 255 | Glucosidase 2 subunit beta                                       | GLU2B_HUMAN | 0.76 | 0.07 |
| 256 | Glutaminyl-tRNA synthetase                                       | SYQ_HUMAN   | 1.15 | 0.11 |
| 257 | Glutathione S-transferase Mu 3                                   | GSTM3_HUMAN | 0.81 | 0.32 |
| 258 | Glutathione S-transferase omega-1                                | GSTO1_HUMAN | 1.68 | 0.00 |
| 259 | Glutathione S-transferase P                                      | GSTP1_HUMAN | 1.51 | 0.02 |
| 260 | Glyceraldehyde-3-phosphate dehydrogenase                         | G3P_HUMAN   | 1.10 | 0.42 |
| 261 | Glycyl-tRNA synthetase                                           | SYG_HUMAN   | 0.97 | 0.80 |
| 262 | GTP-binding nuclear protein Ran                                  | RAN_HUMAN   | 1.11 | 0.10 |
| 263 | Guanine nucleotide-binding protein G(i) subunit alpha-2          | GNAI2_HUMAN | 0.72 | 0.25 |
| 264 | Guanine nucleotide-binding protein G(I)/G(S)/G(T) subunit beta-1 | GBB1_HUMAN  | 0.68 | 0.05 |
| 265 | Guanine nucleotide-binding protein G(s) $\alpha$ isoforms XLas   | GNAS1_HUMAN | 0.96 | 0.89 |
| 266 | Guanine nucleotide-binding protein subunit beta-2-like 1         | GBLP_HUMAN  | 0.73 | 0.07 |
| 267 | Heat shock 70 kDa protein 1A/1B                                  | HSP71_HUMAN | 1.15 | 0.11 |
| 268 | Heat shock 70 kDa protein 4                                      | HSP74_HUMAN | 1.41 | 0.07 |
| 269 | Heat shock cognate 71 kDa protein                                | HSP7C_HUMAN | 1.37 | 0.01 |
| 270 | Heat shock protein 75 kDa, mitochondrial                         | TRAP1_HUMAN | 0.96 | 0.69 |
| 271 | Heat shock protein beta-1                                        | HSPB1_HUMAN | 0.57 | 0.00 |
| 272 | Heat shock protein HSP 90-alpha                                  | HS90A_HUMAN | 1.68 | 0.05 |
| 273 | Heat shock protein HSP 90-beta                                   | HS90B_HUMAN | 1.36 | 0.05 |
| 274 | Hepatoma-derived growth factor                                   | HDGF_HUMAN  | 1.32 | 0.20 |
| 275 | Heterogeneous nuclear ribonucleoprotein A/B                      | ROAA_HUMAN  | 0.78 | 0.25 |
| 276 | Heterogeneous nuclear ribonucleoprotein A0                       | ROA0_HUMAN  | 0.90 | 0.31 |
| 277 | Heterogeneous nuclear ribonucleoprotein A1                       | ROA1_HUMAN  | 0.90 | 0.09 |
| 278 | Heterogeneous nuclear ribonucleoprotein A3                       | ROA3_HUMAN  | 0.90 | 0.31 |
| 279 | Heterogeneous nuclear ribonucleoprotein D0                       | HNRPD_HUMAN | 0.78 | 0.02 |
| 280 | Heterogeneous nuclear ribonucleoprotein D-like                   | HNRDL_HUMAN | 0.97 | 0.42 |
| 281 | Heterogeneous nuclear ribonucleoprotein F                        | HNRPF_HUMAN | 0.87 | 0.33 |
| 282 | Heterogeneous nuclear ribonucleoprotein G                        | HNRPG_HUMAN | 0.73 | 0.01 |
| 283 | Heterogeneous nuclear ribonucleoprotein H                        | HNRH1_HUMAN | 1.00 | 0.98 |
| 284 | Heterogeneous nuclear ribonucleoprotein H3                       | HNRH3_HUMAN | 0.78 | 0.10 |
| 285 | Heterogeneous nuclear ribonucleoprotein K                        | HNRPK_HUMAN | 0.79 | 0.12 |
| 286 | Heterogeneous nuclear ribonucleoprotein L                        | HNRPL_HUMAN | 0.81 | 0.05 |
| 287 | Heterogeneous nuclear ribonucleoprotein M                        | HNRPM_HUMAN | 0.87 | 0.20 |
| 288 | Heterogeneous nuclear ribonucleoprotein Q                        | HNRPQ_HUMAN | 1.03 | 0.42 |
| 289 | Heterogeneous nuclear ribonucleoprotein R                        | HNRPR_HUMAN | 0.78 | 0.02 |
| 290 | Heterogeneous nuclear ribonucleoprotein U                        | HNRPU_HUMAN | 0.93 | 0.29 |
| 291 | Heterogeneous nuclear ribonucleoproteins A2/B1                   | ROA2_HUMAN  | 0.71 | 0.00 |
| 292 | Heterogeneous nuclear ribonucleoproteins C1/C2                   | HNRPC_HUMAN | 0.73 | 0.02 |
| 293 | High mobility group protein B1                                   | HMGB1_HUMAN | 1.37 | 0.07 |
| 294 | High mobility group protein B2                                   | HMGB2_HUMAN | 1.11 | 0.31 |

|     |                                                                 |             |      |      |
|-----|-----------------------------------------------------------------|-------------|------|------|
| 295 | High mobility group protein HMG-I/HMG-Y                         | HMGA1_HUMAN | 0.84 | 0.17 |
| 296 | Histone H1.4                                                    | H14_HUMAN   | 0.69 | 0.09 |
| 297 | Histone H1.5                                                    | H15_HUMAN   | 0.64 | 0.02 |
| 298 | Histone H2A type 2-B                                            | H2A2B_HUMAN | 0.28 | 0.01 |
| 299 | Histone H2A.V                                                   | H2AV_HUMAN  | 0.84 | 0.03 |
| 300 | Histone H2B type 1-J                                            | H2B1J_HUMAN | 0.64 | 0.01 |
| 301 | Histone H3.1t                                                   | H31T_HUMAN  | 0.87 | 0.00 |
| 302 | Histone H4                                                      | H4_HUMAN    | 0.76 | 0.07 |
| 303 | HLA class I histocompatibility antigen, A-68 alpha chain        | 1A68_HUMAN  | 0.84 | 0.17 |
| 304 | HLA class I histocompatibility antigen, B-15 alpha chain        | 1B15_HUMAN  | 1.35 | 0.22 |
| 305 | Hsc70-interacting protein                                       | F10A1_HUMAN | 1.15 | 0.11 |
| 306 | Hypoxia up-regulated protein 1                                  | HYOU1_HUMAN | 0.90 | 0.09 |
| 307 | Importin subunit alpha-1                                        | IMA1_HUMAN  | 1.14 | 0.65 |
| 308 | Importin subunit beta-1                                         | IMB1_HUMAN  | 1.19 | 0.03 |
| 309 | Importin-5                                                      | IPO5_HUMAN  | 1.41 | 0.07 |
| 310 | Importin-7                                                      | IPO7_HUMAN  | 1.52 | 0.01 |
| 311 | Inorganic pyrophosphatase                                       | IPYR_HUMAN  | 1.12 | 0.61 |
| 312 | Inosine-5'-monophosphate dehydrogenase 2                        | IMDH2_HUMAN | 1.03 | 0.80 |
| 313 | Integrin alpha-11                                               | ITA11_HUMAN | 1.03 | 0.82 |
| 314 | Integrin alpha-3                                                | ITA3_HUMAN  | 1.43 | 0.24 |
| 315 | Integrin beta-1                                                 | ITB1_HUMAN  | 1.07 | 0.29 |
| 316 | Interleukin enhancer-binding factor 2                           | ILF2_HUMAN  | 0.68 | 0.03 |
| 317 | Interleukin enhancer-binding factor 3                           | ILF3_HUMAN  | 0.64 | 0.04 |
| 318 | Isocitrate dehydrogenase [NADP] cytoplasmic                     | IDHC_HUMAN  | 1.21 | 0.45 |
| 319 | Isoleucyl-tRNA synthetase, cytoplasmic                          | SYIC_HUMAN  | 1.03 | 0.88 |
| 320 | Keratin, type I cytoskeletal 10                                 | K1C10_HUMAN | 0.54 | 0.04 |
| 321 | Keratin, type I cytoskeletal 17                                 | K1C17_HUMAN | 0.51 | 0.14 |
| 322 | Keratin, type I cytoskeletal 18                                 | K1C18_HUMAN | 0.93 | 0.55 |
| 323 | Keratin, type I cytoskeletal 9                                  | K1C9_HUMAN  | 0.98 | 0.94 |
| 324 | Keratin, type II cytoskeletal 1                                 | K2C1_HUMAN  | 0.84 | 0.42 |
| 325 | Keratin, type II cytoskeletal 2 epidermal                       | K22E_HUMAN  | 0.74 | 0.14 |
| 326 | Keratin, type II cytoskeletal 7                                 | K2C7_HUMAN  | 0.68 | 0.09 |
| 327 | Keratin, type II cytoskeletal 8                                 | K2C8_HUMAN  | 0.64 | 0.04 |
| 328 | KH domain-containing RNA-binding signal trans.-assoc. protein 1 | KHDR1_HUMAN | 0.86 | 0.46 |
| 329 | Kynureninase                                                    | KYNU_HUMAN  | 1.40 | 0.29 |
| 330 | Lamin-A/C                                                       | LMNA_HUMAN  | 0.73 | 0.07 |
| 331 | Lamin-B1                                                        | LMNB1_HUMAN | 0.90 | 0.32 |
| 332 | LanC-like protein 1                                             | LANC1_HUMAN | 0.72 | 0.30 |
| 333 | Large neutral amino acids transporter small subunit 1           | LAT1_HUMAN  | 0.29 | 0.03 |
| 334 | Leucine-rich PPR motif-containing protein, mitochondrial        | LPPRC_HUMAN | 1.22 | 0.56 |
| 335 | Leucine-rich repeat-containing protein 59                       | LRC59_HUMAN | 0.93 | 0.68 |
| 336 | Leucyl-tRNA synthetase, cytoplasmic                             | SYLC_HUMAN  | 0.90 | 0.31 |
| 337 | LIM domain and actin-binding protein 1                          | LIMA1_HUMAN | 0.90 | 0.31 |
| 338 | L-lactate dehydrogenase A chain                                 | LDHA_HUMAN  | 1.32 | 0.04 |
| 339 | L-lactate dehydrogenase B chain                                 | LDHB_HUMAN  | 1.23 | 0.17 |
| 340 | Lupus La protein                                                | LA_HUMAN    | 1.04 | 0.42 |
| 341 | Lysosome-associated membrane glycoprotein 1                     | LAMP1_HUMAN | 0.66 | 0.01 |
| 342 | Lysyl-tRNA synthetase                                           | SYK_HUMAN   | 1.07 | 0.29 |
| 343 | Macrophage migration inhibitory factor                          | MIF_HUMAN   | 2.00 | 0.01 |
| 344 | Malate dehydrogenase, mitochondrial                             | MDHM_HUMAN  | 1.19 | 0.15 |



|     |                                                                  |             |      |      |
|-----|------------------------------------------------------------------|-------------|------|------|
| 345 | Matrin-3                                                         | MATR3_HUMAN | 0.73 | 0.49 |
| 346 | Membrane-associated progesterone receptor component 2            | PGRC2_HUMAN | 0.90 | 0.50 |
| 347 | Methionyl-tRNA synthetase, cytoplasmic                           | SYMC_HUMAN  | 0.90 | 0.32 |
| 348 | Microsomal glutathione S-transferase 1                           | MGST1_HUMAN | 0.81 | 0.08 |
| 349 | Microtubule-associated protein RP/EB family member 1             | MARE1_HUMAN | 1.02 | 0.92 |
| 350 | Mitochondrial carrier homolog 2                                  | MTCH2_HUMAN | 0.66 | 0.01 |
| 351 | Mitochondrial inner membrane protein                             | IMMT_HUMAN  | 1.24 | 0.22 |
| 352 | Moesin                                                           | MOES_HUMAN  | 1.03 | 0.87 |
| 353 | Monocarboxylate transporter 1                                    | MOT1_HUMAN  | 1.03 | 0.71 |
| 354 | Monocarboxylate transporter 4                                    | MOT4_HUMAN  | 0.92 | 0.64 |
| 355 | mRNA turnover protein 4 homolog                                  | MRT4_HUMAN  | 0.99 | 0.95 |
| 356 | Multidrug resistance-associated protein 1                        | MRP1_HUMAN  | 0.74 | 0.41 |
| 357 | Multifunctional protein ADE2                                     | PUR6_HUMAN  | 0.91 | 0.56 |
| 358 | Myb-binding protein 1A                                           | MBB1A_HUMAN | 0.84 | 0.62 |
| 359 | Myoferlin                                                        | MYOF_HUMAN  | 0.69 | 0.15 |
| 360 | Myosin light polypeptide 6                                       | MYL6_HUMAN  | 0.73 | 0.02 |
| 361 | Myosin regulatory light chain 12A                                | ML12A_HUMAN | 0.74 | 0.35 |
| 362 | Myosin-10                                                        | MYH10_HUMAN | 1.03 | 0.71 |
| 363 | Myosin-9                                                         | MYH9_HUMAN  | 0.90 | 0.42 |
| 364 | Myristoylated alanine-rich C-kinase substrate                    | MARCS_HUMAN | 1.52 | 0.05 |
| 365 | N-acetylgalactosaminyltransferase 7                              | GALT7_HUMAN | 0.68 | 0.01 |
| 366 | NAD(P) transhydrogenase, mitochondrial                           | NNTM_HUMAN  | 0.94 | 0.42 |
| 367 | NAD(P)H dehydrogenase [quinone] 1                                | NQO1_HUMAN  | 0.81 | 0.22 |
| 368 | NADH dehydrogenase [ubiquinone] 1 alpha subcomplex subunit 4     | NDUA4_HUMAN | 0.83 | 0.42 |
| 369 | NADH-cytochrome b5 reductase 3                                   | NB5R3_HUMAN | 1.15 | 0.17 |
| 370 | Nascent polypeptide-associated complex subunit alpha             | NACA_HUMAN  | 1.37 | 0.01 |
| 371 | Neuroblast differentiation-associated protein AHNK               | AHNK_HUMAN  | 1.00 | 0.98 |
| 372 | Neuroplastin                                                     | NPTN_HUMAN  | 0.76 | 0.11 |
| 373 | Neutral alpha-glucosidase AB                                     | GANAB_HUMAN | 0.96 | 0.74 |
| 374 | Neutral amino acid transporter B(0)                              | AAAT_HUMAN  | 1.10 | 0.75 |
| 375 | Niban-like protein 1                                             | NIBL1_HUMAN | 1.34 | 0.30 |
| 376 | Non-POU domain-containing octamer-binding protein                | NONO_HUMAN  | 0.62 | 0.01 |
| 377 | Non-specific lipid-transfer protein                              | NLTP_HUMAN  | 0.66 | 0.14 |
| 378 | Nuclear migration protein nudC                                   | NUDC_HUMAN  | 1.46 | 0.01 |
| 379 | Nuclear pore complex protein Nup155                              | NU155_HUMAN | 0.75 | 0.32 |
| 380 | Nuclear pore complex protein Nup205                              | NU205_HUMAN | 0.79 | 0.21 |
| 381 | Nuclear ubiquitous casein and cyclin-dependent kinases substrate | NUCKS_HUMAN | 0.80 | 0.37 |
| 382 | Nuclease-sensitive element-binding protein 1                     | YBOX1_HUMAN | 0.82 | 0.48 |
| 383 | Nucleolar RNA helicase 2                                         | DDX21_HUMAN | 1.27 | 0.18 |
| 384 | Nucleolin                                                        | NUCL_HUMAN  | 0.84 | 0.04 |
| 385 | Nucleophosmin                                                    | NPM_HUMAN   | 1.11 | 0.10 |
| 386 | Nucleoside diphosphate kinase A                                  | NDKA_HUMAN  | 1.23 | 0.08 |
| 387 | Nucleoside diphosphate kinase B                                  | NDKB_HUMAN  | 1.62 | 0.03 |
| 388 | Nucleosome assembly protein 1-like 1                             | NP1L1_HUMAN | 1.28 | 0.10 |
| 389 | PC4 and SFRS1-interacting protein                                | PSIP1_HUMAN | 0.78 | 0.10 |
| 390 | Peptidyl-prolyl cis-trans isomerase A                            | PPIA_HUMAN  | 1.74 | 0.00 |
| 391 | Peptidyl-prolyl cis-trans isomerase B                            | PPIB_HUMAN  | 0.75 | 0.15 |
| 392 | Peptidyl-prolyl cis-trans isomerase FKBP10                       | FKB10_HUMAN | 0.96 | 0.69 |
| 393 | Peptidyl-prolyl cis-trans isomerase FKBP4                        | FKBP4_HUMAN | 1.37 | 0.14 |
| 394 | Peroxiredoxin-1                                                  | PRDX1_HUMAN | 0.87 | 0.33 |

|     |                                                                |             |      |      |
|-----|----------------------------------------------------------------|-------------|------|------|
| 395 | Peroxiredoxin-2                                                | PRDX2_HUMAN | 0.71 | 0.00 |
| 396 | Peroxiredoxin-4                                                | PRDX4_HUMAN | 1.15 | 0.29 |
| 397 | Peroxiredoxin-5, mitochondrial                                 | PRDX5_HUMAN | 1.08 | 0.58 |
| 398 | Peroxiredoxin-6                                                | PRDX6_HUMAN | 1.41 | 0.07 |
| 399 | Phosphoglycerate kinase 1                                      | PGK1_HUMAN  | 1.46 | 0.03 |
| 400 | Phosphoglycerate mutase 1                                      | PGAM1_HUMAN | 1.19 | 0.04 |
| 401 | Plasminogen activator inhibitor 1 RNA-binding protein          | PAIRB_HUMAN | 0.92 | 0.64 |
| 402 | Plastin-3                                                      | PLST_HUMAN  | 1.62 | 0.01 |
| 403 | Platelet-activating factor acetylhydrolase IB subunit beta     | PA1B2_HUMAN | 0.92 | 0.78 |
| 404 | Plectin                                                        | PLEC_HUMAN  | 1.11 | 0.32 |
| 405 | Podocalyxin                                                    | PODXL_HUMAN | 0.79 | 0.12 |
| 406 | Poly [ADP-ribose] polymerase 1                                 | PARP1_HUMAN | 0.75 | 0.15 |
| 407 | Poly(rC)-binding protein 2                                     | PCBP2_HUMAN | 0.97 | 0.80 |
| 408 | Polyadenylate-binding protein 1                                | PABP1_HUMAN | 1.00 | 1.00 |
| 409 | Polypeptide N-acetylgalactosaminyltransferase 2                | GALT2_HUMAN | 0.62 | 0.00 |
| 410 | Polypyrimidine tract-binding protein 1                         | PTBP1_HUMAN | 1.03 | 0.87 |
| 411 | Pre-mRNA-processing factor 19                                  | PRP19_HUMAN | 0.93 | 0.29 |
| 412 | Pre-mRNA-processing-splicing factor 8                          | PRP8_HUMAN  | 0.66 | 0.08 |
| 413 | Probable ATP-dependent RNA helicase DDX17                      | DDX17_HUMAN | 0.66 | 0.01 |
| 434 | Probable ATP-dependent RNA helicase DDX5                       | DDX5_HUMAN  | 0.86 | 0.51 |
| 415 | Procollagen galactosyltransferase 1                            | GT251_HUMAN | 0.54 | 0.10 |
| 416 | Profilin-1                                                     | PROF1_HUMAN | 1.80 | 0.01 |
| 417 | Programmed cell death 6-interacting protein                    | PDC6I_HUMAN | 1.47 | 0.17 |
| 418 | Programmed cell death protein 6                                | PDCD6_HUMAN | 0.59 | 0.03 |
| 419 | Prohibitin-2                                                   | PHB2_HUMAN  | 1.23 | 0.08 |
| 420 | Proliferating cell nuclear antigen                             | PCNA_HUMAN  | 1.01 | 0.97 |
| 421 | Proliferation-associated protein 2G4                           | PA2G4_HUMAN | 1.19 | 0.03 |
| 422 | Prostaglandin E synthase 3                                     | TEBP_HUMAN  | 0.93 | 0.00 |
| 423 | Prostaglandin F2 receptor negative regulator                   | FPRP_HUMAN  | 0.93 | 0.00 |
| 424 | Proteasome activator complex subunit 2                         | PSME2_HUMAN | 1.04 | 0.69 |
| 425 | Proteasome activator complex subunit 3                         | PSME3_HUMAN | 0.67 | 0.14 |
| 426 | Proteasome subunit alpha type-3                                | PSA3_HUMAN  | 1.08 | 0.58 |
| 427 | Proteasome subunit alpha type-4                                | PSA4_HUMAN  | 0.81 | 0.32 |
| 428 | Proteasome subunit alpha type-5                                | PSA5_HUMAN  | 1.32 | 0.00 |
| 429 | Proteasome subunit alpha type-6                                | PSA6_HUMAN  | 0.86 | 0.46 |
| 430 | Proteasome subunit beta type-3                                 | PSB3_HUMAN  | 1.36 | 0.05 |
| 431 | Protein disulfide-isomerase                                    | PDIA1_HUMAN | 0.78 | 0.20 |
| 432 | Protein disulfide-isomerase A3                                 | PDIA3_HUMAN | 0.90 | 0.32 |
| 433 | Protein disulfide-isomerase A4                                 | PDIA4_HUMAN | 0.87 | 0.11 |
| 434 | Protein disulfide-isomerase A6                                 | PDIA6_HUMAN | 0.90 | 0.32 |
| 435 | Protein ERGIC-53                                               | LMAN1_HUMAN | 0.69 | 0.05 |
| 436 | Protein S100-A10                                               | S10AA_HUMAN | 0.61 | 0.03 |
| 437 | Protein S100-A11                                               | S10AB_HUMAN | 0.87 | 0.34 |
| 438 | Protein S100-A4                                                | S10A4_HUMAN | 0.57 | 0.03 |
| 439 | Protein S100-A6                                                | S10A6_HUMAN | 1.07 | 0.29 |
| 440 | Protein SET                                                    | SET_HUMAN   | 1.19 | 0.04 |
| 441 | Protein transport protein Sec31A                               | SC31A_HUMAN | 0.60 | 0.02 |
| 442 | Puromycin-sensitive aminopeptidase                             | PSA_HUMAN   | 1.10 | 0.56 |
| 443 | Put. pre-mRNA-splicing factor ATP-dependent RNA helicase DHX15 | DHX15_HUMAN | 0.87 | 0.00 |
| 444 | Putative RNA-binding protein Luc7-like 2                       | LC7L2_HUMAN | 0.71 | 0.07 |

|     |                                                                   |             |      |      |
|-----|-------------------------------------------------------------------|-------------|------|------|
| 445 | Pyruvate carboxylase, mitochondrial                               | PYC_HUMAN   | 0.85 | 0.71 |
| 446 | Pyruvate dehydrogenase E1 component subunit beta, mitochondrial   | ODPB_HUMAN  | 0.87 | 0.00 |
| 447 | Pyruvate kinase isozymes M1/M2                                    | KPYM_HUMAN  | 1.11 | 0.09 |
| 448 | Radixin                                                           | RADI_HUMAN  | 0.81 | 0.32 |
| 449 | Ran-specific GTPase-activating protein                            | RANG_HUMAN  | 1.52 | 0.08 |
| 450 | Ras GTPase-activating protein-binding protein 1                   | G3BP1_HUMAN | 0.97 | 0.82 |
| 451 | Ras GTPase-activating-like protein IQGAP1                         | IQGA1_HUMAN | 1.06 | 0.70 |
| 452 | Ras-related protein Rab-1B                                        | RAB1B_HUMAN | 1.28 | 0.02 |
| 453 | Ras-related protein Rab-2A                                        | RAB2A_HUMAN | 1.23 | 0.18 |
| 454 | Ras-related protein Rab-7a                                        | RAB7A_HUMAN | 0.87 | 0.29 |
| 455 | Ras-related protein Ral-A                                         | RALA_HUMAN  | 1.07 | 0.68 |
| 456 | Ras-related protein Rap-1b                                        | RAP1B_HUMAN | 0.79 | 0.39 |
| 457 | Replication protein A 70 kDa DNA-binding subunit                  | RFA1_HUMAN  | 1.23 | 0.11 |
| 458 | Reticulocalbin-1                                                  | RCN1_HUMAN  | 0.75 | 0.15 |
| 459 | Reticulon-3                                                       | RTN3_HUMAN  | 0.90 | 0.32 |
| 460 | Reticulon-4                                                       | RTN4_HUMAN  | 0.71 | 0.02 |
| 461 | Rho GDP-dissociation inhibitor 1                                  | GDIR1_HUMAN | 1.42 | 0.11 |
| 462 | Ribonucleoside-diphosphate reductase large subunit                | RIR1_HUMAN  | 1.11 | 0.32 |
| 463 | Ribose-phosphate pyrophosphokinase 1                              | PRPS1_HUMAN | 0.82 | 0.18 |
| 464 | Ribosomal protein S6 kinase alpha-1                               | KS6A1_HUMAN | 0.71 | 0.07 |
| 465 | Ribosome-binding protein 1                                        | RRBP1_HUMAN | 1.27 | 0.18 |
| 466 | RNA-binding protein 8A                                            | RBM8A_HUMAN | 1.07 | 0.29 |
| 467 | RNA-binding protein FUS                                           | FUS_HUMAN   | 0.87 | 0.33 |
| 468 | RNA-binding protein Musashi homolog 2                             | MSI2H_HUMAN | 0.71 | 0.36 |
| 469 | rRNA 2'-O-methyltransferase fibrillar                             | FBRL_HUMAN  | 0.75 | 0.30 |
| 470 | RuvB-like 1                                                       | RUVB1_HUMAN | 0.97 | 0.71 |
| 471 | RuvB-like 2                                                       | RUVB2_HUMAN | 1.03 | 0.42 |
| 472 | Sarcoplasmic/endoplasmic reticulum calcium ATPase 2               | AT2A2_HUMAN | 1.11 | 0.32 |
| 473 | Septin-7                                                          | SEPT7_HUMAN | 1.12 | 0.75 |
| 474 | Serine hydroxymethyltransferase, mitochondrial                    | GLYM_HUMAN  | 0.92 | 0.64 |
| 475 | Serine/threonine-protein phosphatase PP1-beta catalytic subunit   | PP1B_HUMAN  | 0.72 | 0.23 |
| 476 | Serine-threonine kinase receptor-associated protein               | STRAP_HUMAN | 1.11 | 0.32 |
| 477 | Serpin H1                                                         | SERPH_HUMAN | 0.81 | 0.05 |
| 478 | Signal recognition particle 14 kDa protein                        | SRP14_HUMAN | 0.92 | 0.69 |
| 479 | Signal recognition particle 9 kDa protein                         | SRP09_HUMAN | 0.84 | 0.04 |
| 480 | Single-stranded DNA-binding protein, mitochondrial                | SSBP_HUMAN  | 0.90 | 0.32 |
| 481 | Small nuclear ribonucleoprotein G-like protein                    | RUXGL_HUMAN | 0.79 | 0.44 |
| 482 | Small nuclear ribonucleoprotein Sm D3                             | SMD3_HUMAN  | 0.61 | 0.03 |
| 483 | Small nuclear ribonucleoprotein-associated proteins B and B'      | RSMB_HUMAN  | 0.32 | 0.03 |
| 484 | Sodium- and chloride-dependent taurine transporter                | SC6A6_HUMAN | 1.46 | 0.09 |
| 485 | Sodium/potassium-transporting ATPase subunit alpha-1              | AT1A1_HUMAN | 1.00 | 0.97 |
| 486 | Sodium/potassium-transporting ATPase subunit beta-1               | AT1B1_HUMAN | 1.18 | 0.22 |
| 487 | Sodium/potassium-transporting ATPase subunit beta-3               | AT1B3_HUMAN | 0.84 | 0.17 |
| 488 | Solute carrier family 2, facilitated glucose transporter member 1 | GTR1_HUMAN  | 0.74 | 0.33 |
| 489 | Sorcin                                                            | SORCN_HUMAN | 0.92 | 0.69 |
| 490 | Spectrin alpha chain, brain                                       | SPTA2_HUMAN | 0.97 | 0.42 |
| 491 | Spectrin beta chain, brain 1                                      | SPTB2_HUMAN | 1.46 | 0.01 |
| 492 | S-phase kinase-associated protein 1                               | SKP1_HUMAN  | 0.97 | 0.42 |
| 493 | Splicing factor 3B subunit 2                                      | SF3B2_HUMAN | 0.97 | 0.71 |
| 494 | Splicing factor 3B subunit 3                                      | SF3B3_HUMAN | 0.91 | 0.56 |

|     |                                                                 |             |      |      |
|-----|-----------------------------------------------------------------|-------------|------|------|
| 495 | Splicing factor U2AF 65 kDa subunit                             | U2AF2_HUMAN | 0.50 | 0.18 |
| 496 | Splicing factor, arginine/serine-rich 1                         | SFRS1_HUMAN | 0.81 | 0.11 |
| 497 | Splicing factor, arginine/serine-rich 6                         | SFRS6_HUMAN | 0.66 | 0.01 |
| 498 | Splicing factor, proline- and glutamine-rich                    | SFPQ_HUMAN  | 0.84 | 0.03 |
| 499 | Staphylococcal nuclease domain-containing protein 1             | SND1_HUMAN  | 0.91 | 0.64 |
| 500 | Stathmin                                                        | STMN1_HUMAN | 2.07 | 0.00 |
| 501 | Stress-70 protein, mitochondrial                                | GRP75_HUMAN | 0.90 | 0.42 |
| 502 | Stress-induced-phosphoprotein 1                                 | STIP1_HUMAN | 1.23 | 0.08 |
| 503 | Succinate dehydrogenase [ubiquinone] flavoprotein subunit, mito | DHSA_HUMAN  | 0.93 | 0.00 |
| 504 | Succinyl-CoA:3-ketoacid-coenzyme A transferase 1, mitochondrial | SCOT1_HUMAN | 0.78 | 0.20 |
| 505 | SUMO-conjugating enzyme UBC9                                    | UBC9_HUMAN  | 1.81 | 0.02 |
| 506 | Superoxide dismutase [Cu-Zn]                                    | SODC_HUMAN  | 1.36 | 0.05 |
| 507 | Syndecan-2                                                      | SDC2_HUMAN  | 1.36 | 0.12 |
| 508 | Talin-1                                                         | TLN1_HUMAN  | 1.07 | 0.42 |
| 509 | T-complex protein 1 subunit alpha                               | TCPA_HUMAN  | 0.84 | 0.15 |
| 510 | T-complex protein 1 subunit delta                               | TCPD_HUMAN  | 1.19 | 0.30 |
| 511 | T-complex protein 1 subunit epsilon                             | TCPE_HUMAN  | 1.74 | 0.01 |
| 512 | T-complex protein 1 subunit eta                                 | TCPH_HUMAN  | 1.43 | 0.18 |
| 513 | T-complex protein 1 subunit gamma                               | TCPG_HUMAN  | 1.32 | 0.04 |
| 534 | T-complex protein 1 subunit theta                               | TCPQ_HUMAN  | 1.46 | 0.03 |
| 515 | T-complex protein 1 subunit zeta                                | TCPZ_HUMAN  | 1.00 | 0.98 |
| 516 | Thioredoxin                                                     | THIO_HUMAN  | 1.56 | 0.03 |
| 517 | Thioredoxin domain-containing protein 17                        | TXD17_HUMAN | 1.47 | 0.17 |
| 518 | Thioredoxin domain-containing protein 5                         | TXND5_HUMAN | 0.97 | 0.80 |
| 519 | Threonyl-tRNA synthetase, cytoplasmic                           | SYTC_HUMAN  | 1.07 | 0.42 |
| 520 | Thymidylate kinase                                              | KTHY_HUMAN  | 0.81 | 0.05 |
| 521 | Trans-2,3-enoyl-CoA reductase                                   | TECR_HUMAN  | 0.64 | 0.08 |
| 522 | Transcription factor BTF3                                       | BTF3_HUMAN  | 0.91 | 0.64 |
| 523 | Transferrin receptor protein 1                                  | TFR1_HUMAN  | 0.93 | 0.29 |
| 524 | Transformer-2 protein homolog beta                              | TRA2B_HUMAN | 0.79 | 0.18 |
| 525 | Transforming protein RhoA                                       | RHOA_HUMAN  | 1.19 | 0.42 |
| 526 | Transgelin                                                      | TAGL_HUMAN  | 1.32 | 0.03 |
| 527 | Transgelin-2                                                    | TAGL2_HUMAN | 1.68 | 0.05 |
| 528 | Transitional endoplasmic reticulum ATPase                       | TERA_HUMAN  | 0.94 | 0.70 |
| 529 | Transketolase                                                   | TKT_HUMAN   | 0.96 | 0.69 |
| 530 | Translationally-controlled tumor protein                        | TCTP_HUMAN  | 1.64 | 0.11 |
| 531 | Translocon-associated protein subunit alpha                     | SSRA_HUMAN  | 0.73 | 0.12 |
| 532 | Transmembrane protein 97                                        | TMM97_HUMAN | 1.27 | 0.08 |
| 533 | Transportin-1                                                   | TNPO1_HUMAN | 1.34 | 0.28 |
| 534 | Trifunctional enzyme subunit alpha, mitochondrial               | ECHA_HUMAN  | 0.81 | 0.05 |
| 535 | Trifunctional purine biosynthetic protein adenosine-3           | PUR2_HUMAN  | 0.86 | 0.42 |
| 536 | Triosephosphate isomerase                                       | TPIS_HUMAN  | 1.36 | 0.05 |
| 537 | Tripeptidyl-peptidase 2                                         | TPP2_HUMAN  | 0.92 | 0.78 |
| 538 | tRNA (cytosine-5-)-methyltransferase NSUN2                      | NSUN2_HUMAN | 1.28 | 0.52 |
| 539 | Tropomyosin alpha-3 chain                                       | TPM3_HUMAN  | 1.19 | 0.15 |
| 540 | Tropomyosin alpha-4 chain                                       | TPM4_HUMAN  | 1.11 | 0.10 |
| 541 | Trypsin-2                                                       | TRY2_HUMAN  | 0.70 | 0.11 |
| 542 | Tryptophanyl-tRNA synthetase, cytoplasmic                       | SYWC_HUMAN  | 1.04 | 0.79 |
| 543 | Tubulin alpha-4A chain                                          | TBA4A_HUMAN | 0.71 | 0.22 |
| 544 | Tubulin beta chain                                              | TBB5_HUMAN  | 0.76 | 0.00 |

|     |                                                     |             |      |      |
|-----|-----------------------------------------------------|-------------|------|------|
| 545 | Tubulin beta-2C chain                               | TBB2C_HUMAN | 0.76 | 0.11 |
| 546 | Tubulin beta-4 chain                                | TBB4_HUMAN  | 0.60 | 0.05 |
| 547 | Tubulin--tyrosine ligase-like protein 12            | TTL12_HUMAN | 1.18 | 0.52 |
| 548 | Tyrosine-protein kinase BAZ1B                       | BAZ1B_HUMAN | 0.78 | 0.46 |
| 549 | Tyrosyl-tRNA synthetase, cytoplasmic                | SYYC_HUMAN  | 1.36 | 0.05 |
| 550 | U1 small nuclear ribonucleoprotein 70 kDa           | RU17_HUMAN  | 0.93 | 0.55 |
| 551 | U2 small nuclear ribonucleoprotein A'               | RU2A_HUMAN  | 1.00 | 1.00 |
| 552 | U5 small nuclear ribonucleoprotein 200 kDa helicase | U520_HUMAN  | 1.00 | 1.00 |
| 553 | Ubiquitin-40S ribosomal protein S27a                | RS27A_HUMAN | 1.82 | 0.08 |
| 554 | Ubiquitin-like modifier-activating enzyme 1         | UBA1_HUMAN  | 1.36 | 0.05 |
| 555 | UPF0556 protein C19orf10                            | CS010_HUMAN | 0.40 | 0.07 |
| 556 | Vesicle-trafficking protein SEC22b                  | SC22B_HUMAN | 1.03 | 0.71 |
| 557 | Vesicular integral-membrane protein VIP36           | LMAN2_HUMAN | 0.82 | 0.25 |
| 558 | Vigilin                                             | VIGLN_HUMAN | 0.76 | 0.03 |
| 559 | Vimentin                                            | VIME_HUMAN  | 1.03 | 0.71 |
| 560 | Voltage-dependent anion-selective channel protein 1 | VDAC1_HUMAN | 0.93 | 0.58 |
| 561 | Voltage-dependent anion-selective channel protein 2 | VDAC2_HUMAN | 0.84 | 0.17 |
| 562 | WD repeat-containing protein 1                      | WDR1_HUMAN  | 1.37 | 0.23 |
| 563 | X-ray repair cross-complementing protein 5          | XRCC5_HUMAN | 0.68 | 0.03 |
| 564 | X-ray repair cross-complementing protein 6          | XRCC6_HUMAN | 0.87 | 0.11 |

The relative abundance of all 564 proteins identified in the comparative iTRAQ analysis of apoptotic and viable membrane vesicles are listed.

**Supplemental Figure 1: Glycolytic enzyme molecules are not externalized on autophagic or necrotic cells.**

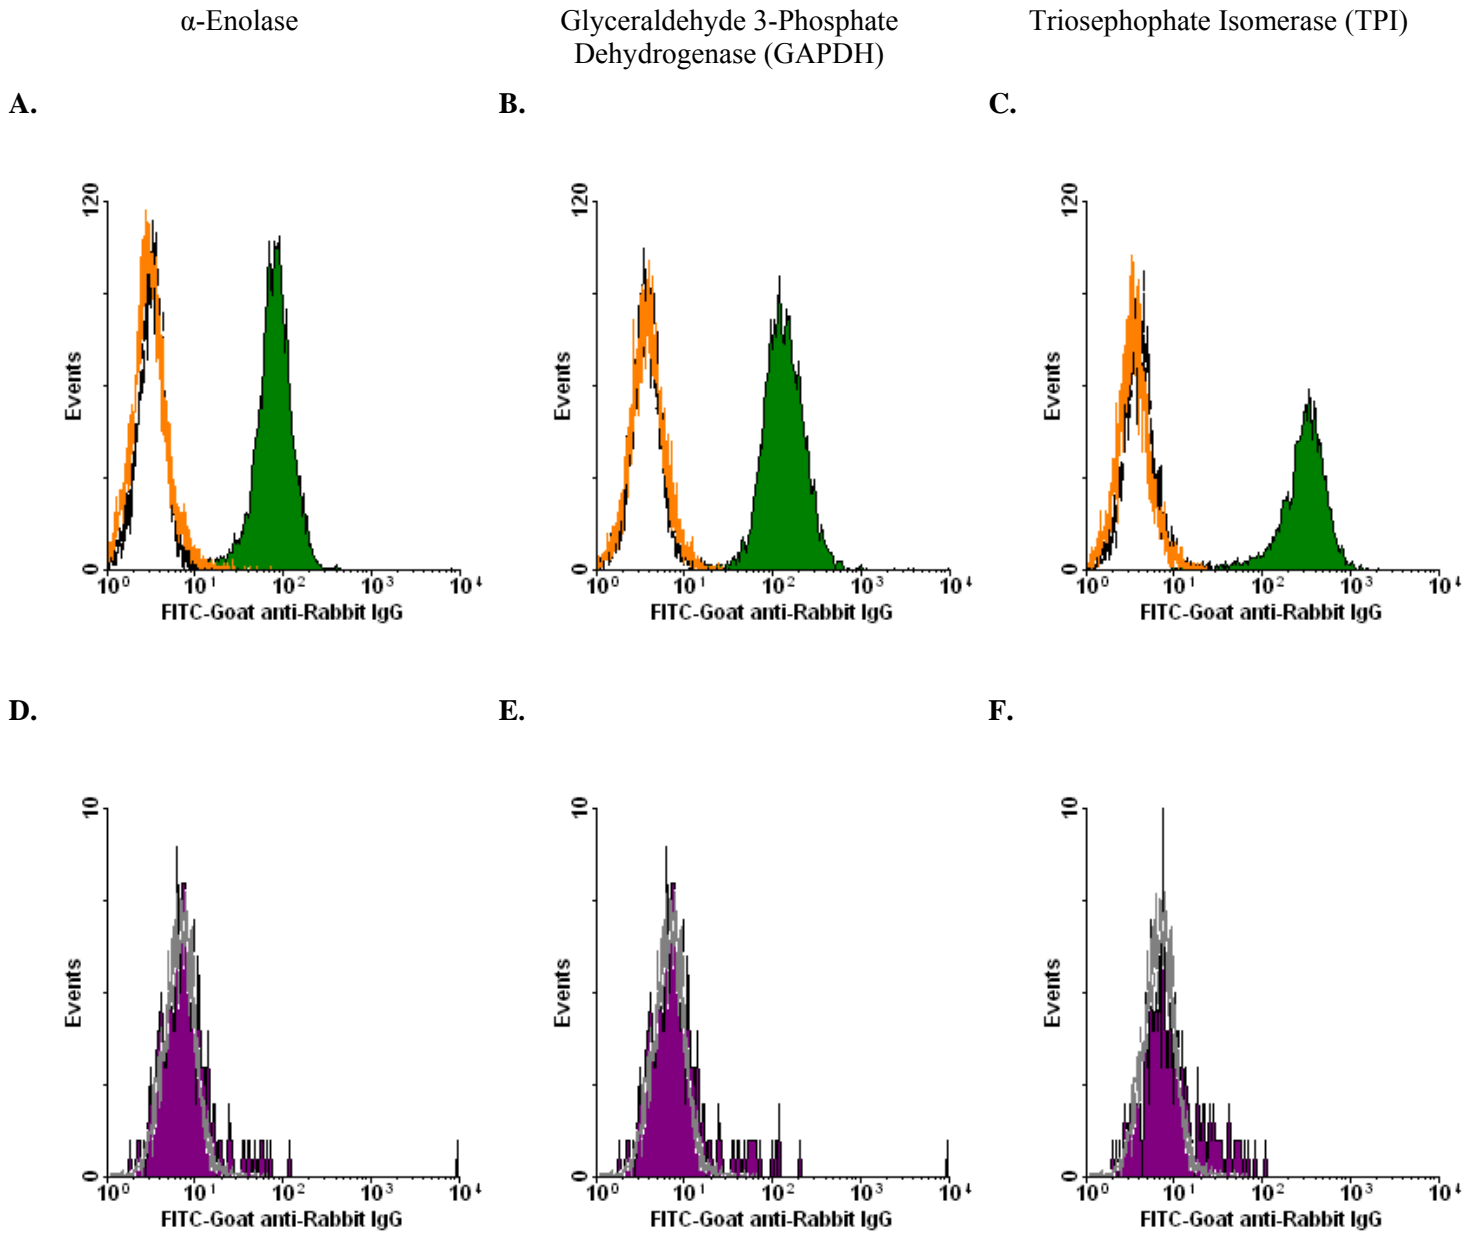

**Supplemental Figure 2: Apoptotic externalization of glycolytic enzyme molecules is caspase-dependent.**

**A.**  $\alpha$ -Enolase

**B.** Glyceraldehyde 3-Phosphate  
Dehydrogenase (GAPDH)

**C.** Triosephosphate Isomerase (TPI)

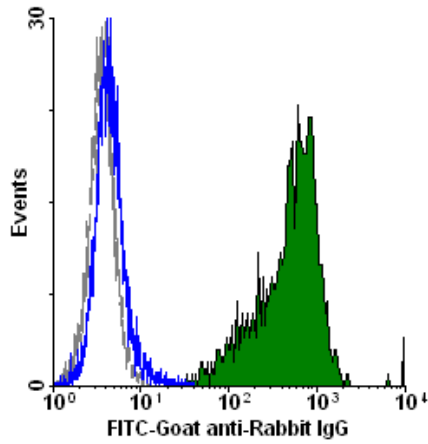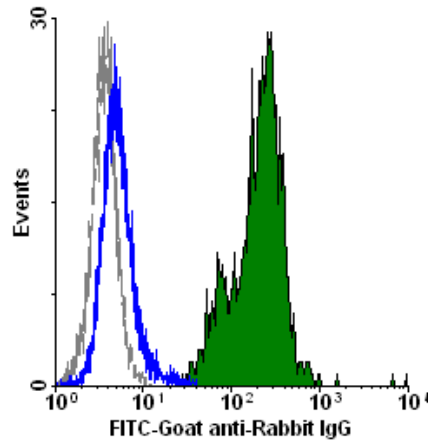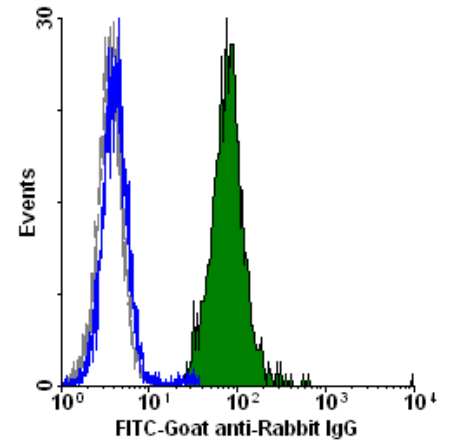

Supplement: supp_M111.314971_jbc.M111.314971-1.pdf [file supp_M111.314971_jbc.M111.314971-1.pdf]
